# Supplementary material for: Benefits of a Bacillus probiotic to larval fish survival and transport stress resistance
Source: PubMed Central journal article supplement (PMC6426941; doi:10.1038/s41598-019-39316-w), 2019-03-20
Supplement: 41598_2019_39316_MOESM1_ESM.pdf [file 41598_2019_39316_MOESM1_ESM.pdf]

**Manuscript Title:** Benefits of a *Bacillus* probiotic to larval fish survival and transport stress resistance

**Authors:** Andrea M. Tarnecki, Marzie Wafapoor, Remy N. Phillips, Nicole R. Rhody

**Supplemental Information**

**Supplementary Table S1.** Permutational analysis of variance (PERMANOVA) results for microbiota structure between sample types (water versus larvae), sampling day, and treatment.

| Source                        | Trial 1 |          |          |          |         |                     | Trial 2 |          |          |          |         |                     |
|-------------------------------|---------|----------|----------|----------|---------|---------------------|---------|----------|----------|----------|---------|---------------------|
|                               | df      | SS       | MS       | Pseudo-F | P(perm) | Unique permutations | df      | SS       | MS       | Pseudo-F | P(perm) | Unique permutations |
| Sample type                   | 1       | 43,427.0 | 43,427.0 | 41.644   | 0.001   | 998                 | 1       | 38,419.0 | 38,419.0 | 32.655   | 0.001   | 997                 |
| Day                           | 2       | 43,692.0 | 21,846.0 | 20.949   | 0.001   | 998                 | 2       | 32,349.0 | 16,174.0 | 13.748   | 0.001   | 996                 |
| Treatment                     | 2       | 20,659.0 | 10,330.0 | 9.9053   | 0.001   | 998                 | 3       | 9,984.1  | 3,328.0  | 2.8287   | 0.001   | 996                 |
| Sample type x Day             | 2       | 41,960.0 | 20,980.0 | 20.118   | 0.001   | 994                 | 2       | 23,703.0 | 11,851.0 | 10.073   | 0.001   | 998                 |
| Sample type x Treatment       | 2       | 8,619.4  | 4,309.7  | 4.1327   | 0.001   | 999                 | 2       | 3,730.9  | 1,865.5  | 1.5856   | 0.006   | 996                 |
| Day x Treatment               | 6       | 30,785.0 | 5,130.9  | 4.9201   | 0.001   | 998                 | 6       | 18,967.0 | 3,161.2  | 2.6869   | 0.001   | 998                 |
| Sample type x Day x Treatment | 4       | 15,674.0 | 3,918.5  | 3.7575   | 0.001   | 997                 | 4       | 10,867.0 | 2,716.7  | 2.3091   | 0.001   | 996                 |
| Residuals                     | 103     | 1.07E+05 | 1,042.8  |          |         |                     | 109     | 1.28E+05 | 1,176.5  |          |         |                     |
| Total                         | 125     | 4.17E+05 |          |          |         |                     | 133     | 3.99E+05 |          |          |         |                     |

**Supplementary Table S2.** Permutational analysis of variance (PERMANOVA) pair-wise comparison results for microbiota structure between treatments within each sampling type (water versus larvae) and sampling day. dph, days post hatch. Significant ( $P < 0.05$ ) comparisons are shown in bold type.

| Sample Type | Day       | Trial 1      |              |              | Trial 2      |              |              |
|-------------|-----------|--------------|--------------|--------------|--------------|--------------|--------------|
|             |           | CONT vs PBWO | CONT vs PBWF | PBWO vs PBWF | CONT vs PBWO | CONT vs PBWF | PBWO vs PBWF |
| Fish        | 7 dph     | <b>0.007</b> | <b>0.028</b> | <b>0.003</b> | 0.200        | <b>0.031</b> | 0.474        |
|             | 14 dph    | <b>0.008</b> | <b>0.003</b> | 0.119        | 0.157        | 0.339        | 0.053        |
|             | 28/26 dph | <b>0.028</b> | 0.145        | <b>0.017</b> | 0.181        | 0.615        | 0.078        |
| Water       | Day 0     | <b>0.005</b> | <b>0.003</b> | <b>0.006</b> | 0.080        | <b>0.004</b> | <b>0.003</b> |
|             | Day 7     | <b>0.002</b> | <b>0.002</b> | <b>0.003</b> | <b>0.007</b> | <b>0.016</b> | <b>0.004</b> |
|             | Day 14    | <b>0.036</b> | <b>0.002</b> | <b>0.005</b> | 0.774        | <b>0.003</b> | <b>0.010</b> |
|             | Day 28/26 | <b>0.004</b> | <b>0.006</b> | <b>0.009</b> | 0.072        | <b>0.009</b> | <b>0.011</b> |



**Supplementary Table S4.** Number of consistently discriminative OTUs (as determined by linear discriminant analysis effect size, LEfSe<sup>24</sup>) among treatments within the water microbiota during two probiotic trials. Red indicates higher abundances in control larvae; green indicates higher abundances in probiotic-treated larvae. Where some OTUs were higher in control larvae and other OTUs within the same taxon were higher in treatment larvae, the cell is split appropriately.

| Taxon                                    | Day 0   |         |         |         | Day 7   |         |         |         | Day 14  |         |         |         | Day 28/26 |         |         |         |    |    |   |   |   |   |    |    |   |   |   |
|------------------------------------------|---------|---------|---------|---------|---------|---------|---------|---------|---------|---------|---------|---------|-----------|---------|---------|---------|----|----|---|---|---|---|----|----|---|---|---|
|                                          | PBWO    |         | PBWF    |         | PBWO    |         | PBWF    |         | PBWO    |         | PBWF    |         | PBWO      |         | PBWF    |         |    |    |   |   |   |   |    |    |   |   |   |
|                                          | Trial 1 | Trial 2 | Trial 1 | Trial 2 | Trial 1 | Trial 2 | Trial 1 | Trial 2 | Trial 1 | Trial 2 | Trial 1 | Trial 2 | Trial 1   | Trial 2 | Trial 1 | Trial 2 |    |    |   |   |   |   |    |    |   |   |   |
| Domain Bacteria                          | 1       | 1       | 6       | 1       | 13      | 7       | 0       | 0       | 1       | 2       | 3       | 5       | 2         | 2       | 1       | 7       | 3  | 3  | 1 | 8 | 5 | 4 |    |    |   |   |   |
| Order Flavobacteriales                   | 1       | 1       | 0       | 0       | 0       | 0       | 0       | 0       | 0       | 0       | 0       | 0       | 0         | 0       | 0       | 0       | 0  | 0  | 0 | 0 |   |   |    |    |   |   |   |
| Family Flavobacteriaceae                 | 2       | 1       | 2       | 1       | 0       | 0       | 0       | 0       | 0       | 0       | 1       | 1       | 0         | 0       | 0       | 0       |    |    |   |   |   |   |    |    |   |   |   |
| Genus <i>Tenacibaculum</i>               | 0       | 0       | 0       | 0       | 2       | 1       | 0       | 0       | 0       | 0       | 0       | 0       | 0         | 0       | 0       | 0       |    |    |   |   |   |   |    |    |   |   |   |
| Family NS11-12 marine group              | 3       | 1       | 1       | 1       | 0       | 0       | 0       | 0       | 0       | 0       | 0       | 0       | 0         | 0       | 0       | 0       |    |    |   |   |   |   |    |    |   |   |   |
| Order Chlamydiales                       | 1       | 7       | 4       | 1       | 10      | 0       | 0       | 0       | 0       | 0       | 0       | 0       | 0         | 0       | 0       | 0       | 0  |    |   |   |   |   |    |    |   |   |   |
| Family Bacillaceae                       | 1       | 1       | 1       | 1       | 1       | 1       | 1       | 1       | 0       | 0       | 0       | 0       | 1         | 1       | 1       | 1       |    |    |   |   |   |   |    |    |   |   |   |
| Genus <i>Fusibacter</i>                  | 0       | 0       | 0       | 0       | 0       | 0       | 0       | 0       | 0       | 0       | 0       | 0       | 0         | 0       | 1       | 1       |    |    |   |   |   |   |    |    |   |   |   |
| Phylum Gracilibacteria                   | 1       | 1       | 1       | 1       | 1       | 2       | 0       | 0       | 0       | 0       | 1       | 1       | 1         | 2       | 4       | 2       | 7  | 2  |   |   |   |   |    |    |   |   |   |
| Class Pacebacteria                       | 0       | 0       | 0       | 0       | 0       | 0       | 0       | 0       | 0       | 0       | 2       | 1       | 0         | 0       | 1       | 1       |    |    |   |   |   |   |    |    |   |   |   |
| Phylum Parcubacteria                     | 0       | 0       | 0       | 0       | 0       | 0       | 0       | 0       | 0       | 0       | 0       | 0       | 0         | 0       | 1       | 5       |    |    |   |   |   |   |    |    |   |   |   |
| Phylum Peregrinibacteria                 | 0       | 0       | 0       | 0       | 0       | 0       | 4       | 3       | 0       | 0       | 0       | 0       | 5         | 2       | 2       | 2       |    |    |   |   |   |   |    |    |   |   |   |
| Genus <i>Planctomyces</i>                | 1       | 1       | 0       | 0       | 0       | 0       | 0       | 0       | 0       | 0       | 0       | 0       | 0         | 0       | 0       | 0       |    |    |   |   |   |   |    |    |   |   |   |
| Phylum Proteobacteria                    | 1       | 3       | 3       | 0       | 0       | 1       | 3       | 1       | 2       | 3       | 0       | 0       | 4         | 2       | 1       | 8       | 2  | 1  | 1 | 2 | 1 | 2 |    |    |   |   |   |
| Class Alphaproteobacteria                | 4       | 5       | 2       | 3       | 4       | 4       | 0       | 0       | 1       | 2       | 1       | 1       | 5         | 2       | 0       | 0       | 4  | 1  | 1 | 1 |   |   |    |    |   |   |   |
| Order 4-Org1-14                          | 1       | 3       | 0       | 0       | 0       | 0       | 1       | 1       | 0       | 0       | 0       | 0       | 0         | 0       | 0       | 0       |    |    |   |   |   |   |    |    |   |   |   |
| Order Alphaproteobacteria Incertae Sedis | 3       | 1       | 3       | 4       | 1       | 2       | 1       | 3       | 2       | 5       | 3       | 1       | 18        | 4       | 15      | 1       | 1  | 15 | 4 |   |   |   |    |    |   |   |   |
| Family Erythrobacteraceae                | 1       | 1       | 0       | 0       | 0       | 0       | 0       | 0       | 0       | 0       | 0       | 0       | 0         | 0       | 0       | 0       |    |    |   |   |   |   |    |    |   |   |   |
| Order Rhizobiales                        | 0       | 0       | 1       | 2       | 1       | 1       | 0       | 0       | 0       | 0       | 0       | 0       | 0         | 0       | 0       | 0       | 0  | 0  |   |   |   |   |    |    |   |   |   |
| Genus <i>Hyphomicrobium</i>              | 0       | 0       | 1       | 1       | 0       | 0       | 0       | 0       | 0       | 0       | 0       | 0       | 0         | 0       | 0       | 0       |    |    |   |   |   |   |    |    |   |   |   |
| Genus <i>Maritalea</i>                   | 0       | 0       | 0       | 0       | 0       | 0       | 0       | 0       | 0       | 0       | 0       | 0       | 1         | 1       | 0       | 0       |    |    |   |   |   |   |    |    |   |   |   |
| Family OCS116 clade                      | 0       | 0       | 1       | 1       | 0       | 0       | 0       | 0       | 0       | 0       | 0       | 0       | 0         | 0       | 0       | 0       |    |    |   |   |   |   |    |    |   |   |   |
| Family Rhodobacteraceae                  | 5       | 4       | 7       | 7       | 4       | 7       | 5       | 5       | 5       | 1       | 5       | 2       | 1         | 0       | 0       | 2       | 2  | 2  | 3 | 2 | 3 | 4 | 2  | 3  | 3 | 3 | 1 |
| Genus <i>Epibacterium</i>                | 0       | 0       | 0       | 0       | 0       | 0       | 0       | 0       | 0       | 0       | 0       | 0       | 0         | 0       | 1       | 1       |    |    |   |   |   |   |    |    |   |   |   |
| Family Rhodospirillaceae                 | 2       | 1       | 1       | 3       | 0       | 0       | 0       | 0       | 0       | 0       | 0       | 0       | 0         | 0       | 0       | 0       |    |    |   |   |   |   |    |    |   |   |   |
| Order Rickettsiales                      | 0       | 0       | 1       | 2       | 0       | 0       | 0       | 0       | 0       | 0       | 0       | 0       | 0         | 0       | 2       | 1       |    |    |   |   |   |   |    |    |   |   |   |
| Class Deltaproteobacteria                | 0       | 0       | 0       | 0       | 0       | 0       | 0       | 0       | 0       | 0       | 0       | 0       | 2         | 1       | 0       | 0       |    |    |   |   |   |   |    |    |   |   |   |
| Genus <i>Arcobacter</i>                  | 0       | 0       | 0       | 0       | 0       | 0       | 0       | 0       | 0       | 0       | 0       | 0       | 1         | 1       | 2       | 1       |    |    |   |   |   |   |    |    |   |   |   |
| Class Gammaproteobacteria                | 11      | 5       | 13      | 6       | 6       | 7       | 15      | 9       | 3       | 2       | 3       | 5       | 1         | 5       | 9       | 4       | 11 | 3  | 4 | 1 | 7 | 3 | 13 | 14 | 4 | 3 |   |
| Genus <i>Marinobacter</i>                | 0       | 0       | 0       | 0       | 0       | 0       | 0       | 0       | 1       | 1       | 0       | 0       | 0         | 0       | 0       | 0       |    |    |   |   |   |   |    |    |   |   |   |
| Genus <i>Idiomarina</i>                  | 2       | 2       | 3       | 2       | 0       | 0       | 0       | 0       | 0       | 0       | 0       | 0       | 0         | 0       | 0       | 0       |    |    |   |   |   |   |    |    |   |   |   |
| Genus <i>Coxiella</i>                    | 2       | 1       | 1       | 1       | 0       | 0       | 0       | 0       | 0       | 0       | 0       | 0       | 0         | 0       | 0       | 0       |    |    |   |   |   |   |    |    |   |   |   |
| Family Legionellaceae                    | 1       | 1       | 0       | 0       | 0       | 0       | 0       | 0       | 0       | 0       | 0       | 0       | 0         | 0       | 0       | 0       |    |    |   |   |   |   |    |    |   |   |   |
| Genus <i>Legionella</i>                  | 0       | 0       | 0       | 0       | 0       | 0       | 0       | 0       | 0       | 0       | 1       | 1       | 0         | 0       | 0       | 0       |    |    |   |   |   |   |    |    |   |   |   |
| Genus <i>Alcanivorax</i>                 | 1       | 1       | 1       | 1       | 0       | 0       | 0       | 0       | 0       | 0       | 0       | 0       | 0         | 0       | 0       | 0       |    |    |   |   |   |   |    |    |   |   |   |
| Genus <i>Kangiella</i>                   | 1       | 1       | 1       | 1       | 0       | 0       | 0       | 0       | 0       | 0       | 0       | 0       | 0         | 0       | 0       | 0       |    |    |   |   |   |   |    |    |   |   |   |
| Genus <i>Halomonas</i>                   | 1       | 1       | 0       | 0       | 0       | 0       | 0       | 0       | 0       | 0       | 1       | 1       | 0         | 0       | 0       | 0       |    |    |   |   |   |   |    |    |   |   |   |
| Family Vibrionaceae                      | 0       | 0       | 0       | 0       | 0       | 0       | 0       | 0       | 0       | 0       | 1       | 3       | 0         | 0       | 0       | 0       |    |    |   |   |   |   |    |    |   |   |   |
| Phylum SBR1093                           | 0       | 0       | 2       | 1       | 0       | 0       | 0       | 0       | 0       | 0       | 0       | 0       | 0         | 0       | 0       | 0       |    |    |   |   |   |   |    |    |   |   |   |
| Phylum TM6 (Dependentiae)                | 3       | 1       | 4       | 3       | 1       | 4       | 4       | 3       | 0       | 0       | 0       | 0       | 0         | 0       | 5       | 4       | 1  | 1  |   |   |   |   |    |    |   |   |   |

**Supplementary Table S5.** Consistent differences in predicted metagenome function (as determined by phylogenetic investigation of communities by reconstruction of unobserved states, PICRUST<sup>23</sup>) among treatments within the fish and water microbiota during two probiotic trials. The treatment with the highest level of function is listed for each Trial. Functions increased in control are highlighted in gray. Functions increased in probiotic-treatments are highlighted in green. N/A indicates no significant difference within a KEGG pathway in a Trial.

| Sample Type | Level 1                        | Level 2                                     | Level 3                                    | Day   | Trial 1   | Trial 2     |
|-------------|--------------------------------|---------------------------------------------|--------------------------------------------|-------|-----------|-------------|
| Fish        | Cellular Processes             | Sporulation                                 | unclassified                               | 14    | PBWF      | PBWF        |
|             | Metabolism                     | Xenobiotics biodegradation and metabolism   | Dioxin degradation                         | 7     | PBWO/PBWF | N/A         |
|             | Metabolism                     | Xenobiotics biodegradation and metabolism   | Ethylbenzene degradation                   | 7     | N/A       | PBWO        |
|             | Metabolism                     | Xenobiotics biodegradation and metabolism   | Styrene degradation                        | 7     | N/A       | PBWO        |
|             | Metabolism                     | Xenobiotics biodegradation and metabolism   | Xylene degradation                         | 7     | PBWF      | N/A         |
| Water       | Cellular Processes             | Cell motility                               | Bacterial chemotaxis                       | 0     | CONT      | N/A         |
|             | Cellular Processes             | Transport and catabolism                    | Peroxisome                                 | 7     | PBWO/PBWF | PBWF        |
|             | Genetic Information Processing | Folding, sorting and degradation            | Sulfur relay system                        | 0     | CONT      | CONT        |
|             | Genetic Information Processing | Translation                                 | Aminoacyl-tRNA biosynthesis                | 7     | PBWO/PBWF | PBWO > CONT |
|             | Metabolism                     | Amino acid metabolism                       | Lysine degradation                         | 0     | PBWO/PBWF | PBWO/PBWF   |
|             | Metabolism                     | Biosynthesis of other secondary metabolites | Isoflavonoid biosynthesis                  | 0     | PBWO/PBWF | PBWO/PBWF   |
|             | Metabolism                     | Biosynthesis of other secondary metabolites | Isoflavonoid biosynthesis                  | 28/26 | PBWO/PBWF | PBWO/PBWF   |
|             | Metabolism                     | Carbohydrate Metabolism                     | Butanoate metabolism                       | 0     | PBWO/PBWF | PBWO/PBWF   |
|             | Metabolism                     | Carbohydrate Metabolism                     | Propanoate metabolism                      | 0     | PBWO/PBWF | PBWO/PBWF   |
|             | Metabolism                     | Carbohydrate Metabolism                     | Pyruvate metabolism                        | 7     | PBWF      | PBWF        |
|             | Metabolism                     | Energy metabolism                           | Sulfur metabolism                          | 0     | CONT      | CONT        |
|             | Metabolism                     | Lipid metabolism                            | Synthesis and degradation of ketone bodies | 0     | PBWO/PBWF | PBWO/PBWF   |
|             | Metabolism                     | Metabolism of cofactors and vitamins        | Pathothenate and CoA biosynthesis          | 7     | PBWO/PBWF | PBWF        |
|             | Metabolism                     | Metabolism of cofactors and vitamins        | Porphyrin and chlorophyll metabolism       | 0     | CONT      | N/A         |
|             | Metabolism                     | Metabolism of cofactors and vitamins        | Vitamin B6 metabolism                      | 0     | CONT      | CONT        |
|             | Metabolism                     | Metabolism of other amino acids             | Phosphonate and phosphinate metabolism     | 28/26 | PBWF      | PBWF        |
|             | Metabolism                     | Metabolism of terpenoids and polyketides    | Geraniol degradation                       | 0     | PBWO/PBWF | PBWO/PBWF   |
|             | Metabolism                     | Metabolism of terpenoids and polyketides    | Geraniol degradation                       | 7     | PBWF      | PBWF        |
|             | Metabolism                     | Metabolism of terpenoids and polyketides    | Terpenoid backbone biosynthesis            | 7     | PBWF      | PBWO/PBWF   |
|             | Metabolism                     | Xenobiotics biodegradation and metabolism   | Naphthalene degradation                    | 0     | PBWO/PBWF | PBWO/PBWF   |
